# Supplementary material for: A genome-wide association study for gut metagenome in Chinese adults illuminates complex diseases
Source: PubMed Central journal article supplement (PMC7873036; doi:10.1038/s41421-020-00239-w), 2021-02-09
Supplement: 41421_2020_239_MOESM1_ESM.pdf [file 41421_2020_239_MOESM1_ESM.pdf]

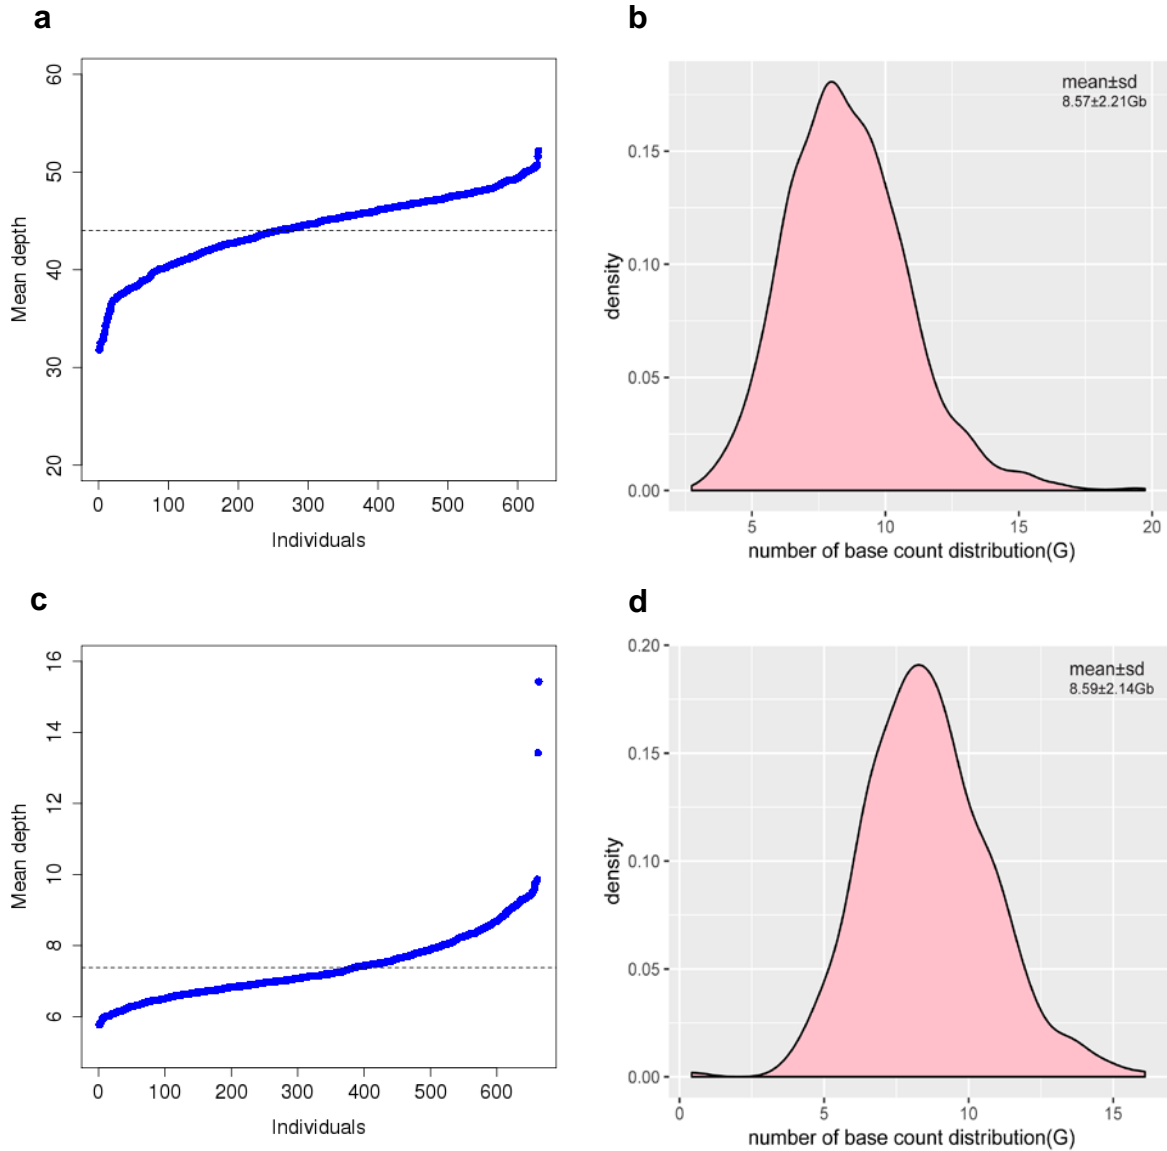

**Supplementary Fig. S1. Whole genome and metagenome sequencing data production.**

**a**, Depth distribution of 632 high-depth WGS samples in discovery cohort. The mean depth is 44x. **b**, Metagenome sequencing at an average of  $8.57 \pm 2.21$  Gb per sample in discovery cohort. **c**, Depth distribution of 663 low-depth WGS samples in replication cohort. The mean depth is 7x. **d**, Metagenome sequencing at an average of  $8.59 \pm 2.14$  Gb per sample in replication cohort.

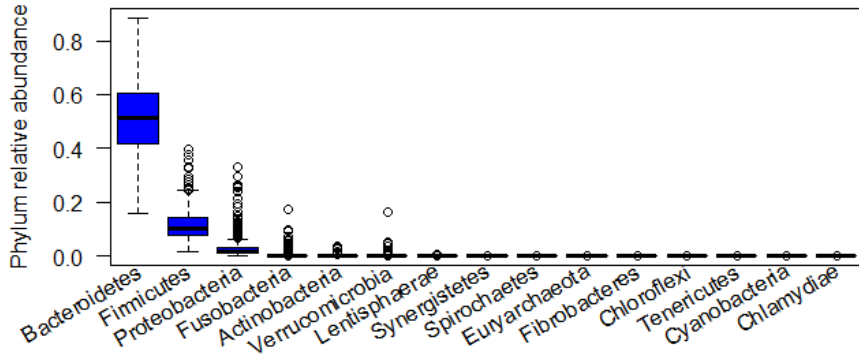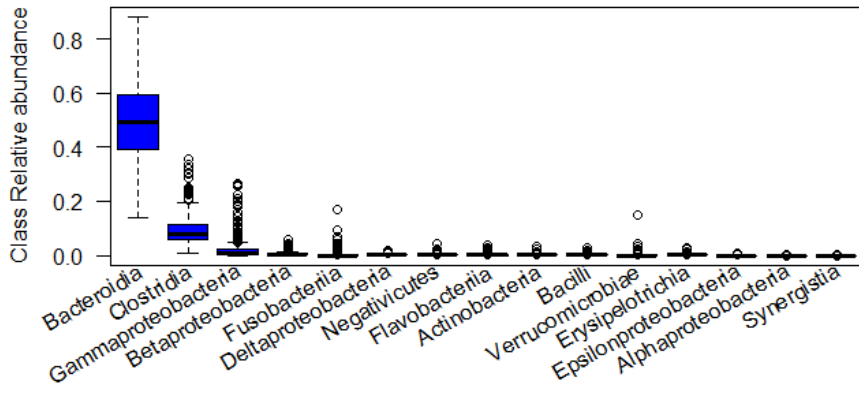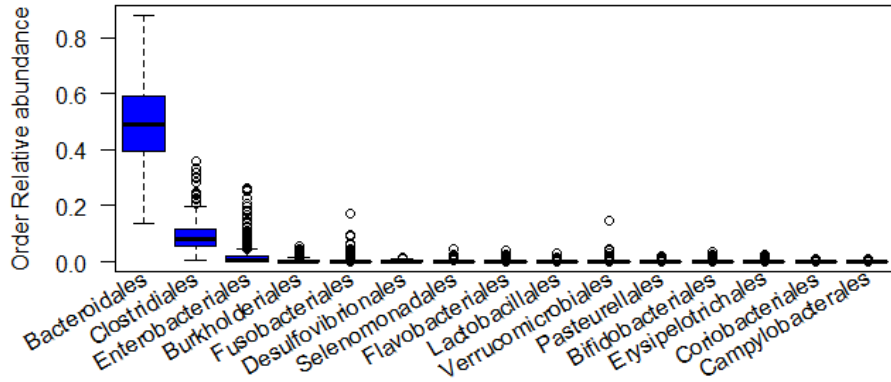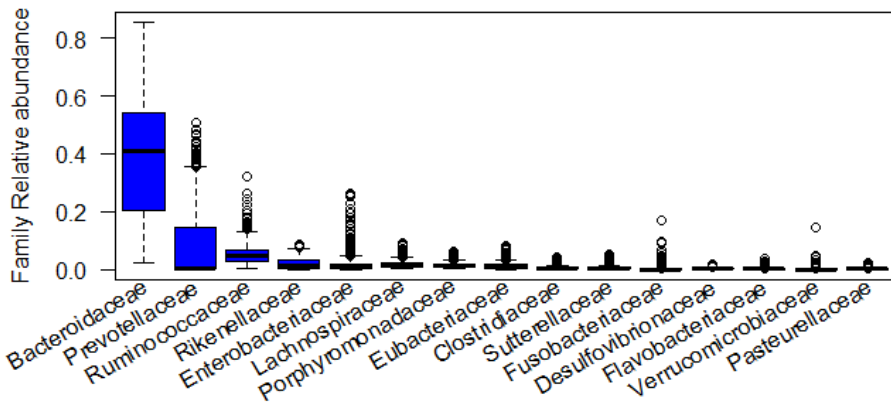

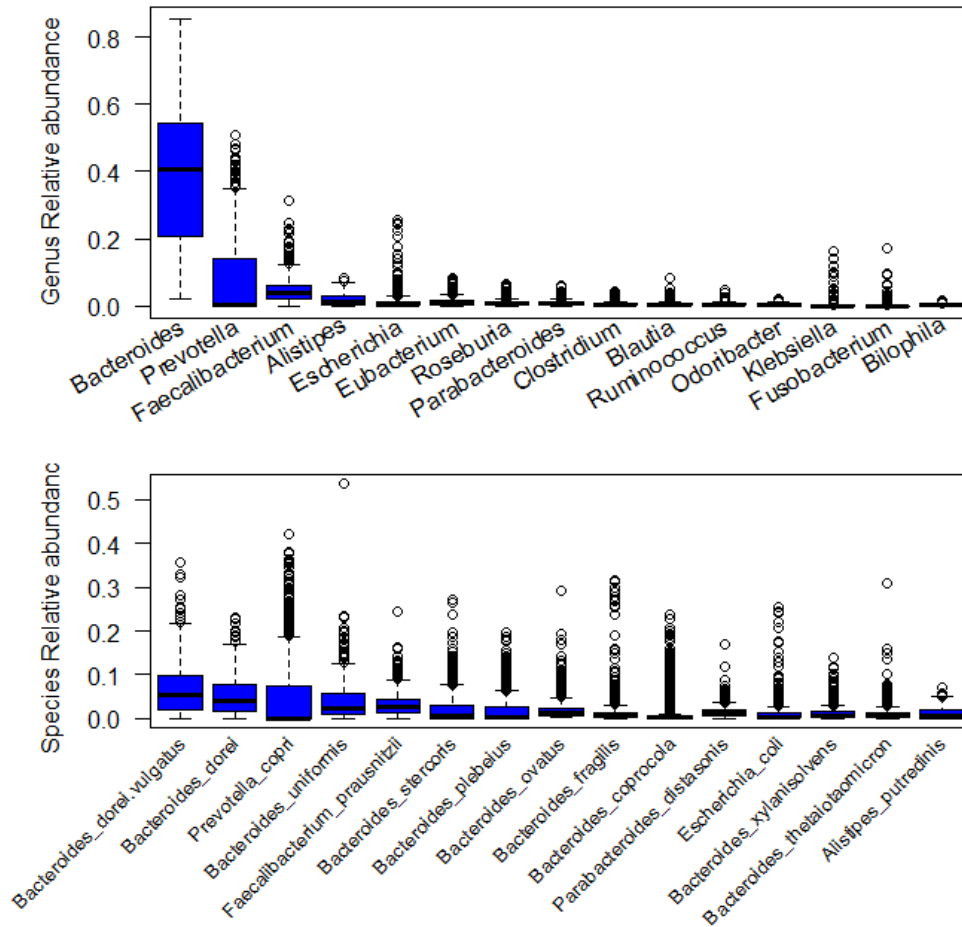

**Supplementary Fig. S2. Box and whisker plot of the top 15 taxa with high relative abundance from phylum to species level in the Chinese cohort.** Boxes represent the interquartile range (IQR) between first and third quartiles and the line inside represents the median. Whiskers denote the lowest and highest values within  $1.5 \times$  IQR from the first and third quartiles, respectively. Circles represent outliers beyond the whiskers.

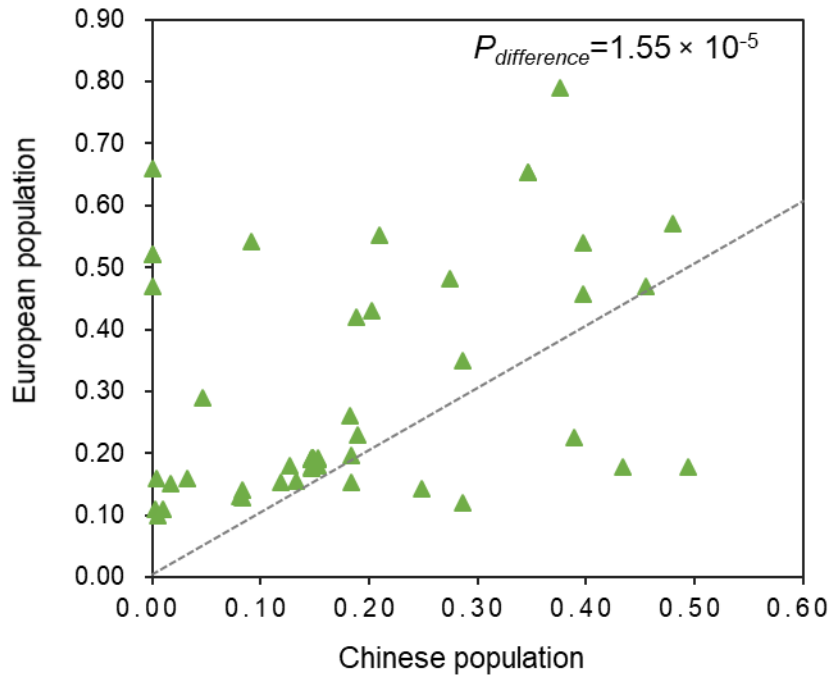

**Supplementary Fig. S3. The alleles frequencies difference of reported 64 loci associated with beta-diversity between two populations.** The European population represents the EUR population in 1000genome phase3, and the alleles frequencies were acquired by searching in Haploreg website (<https://pubs.broadinstitute.org/mammals/haploreg/haploreg.php>).

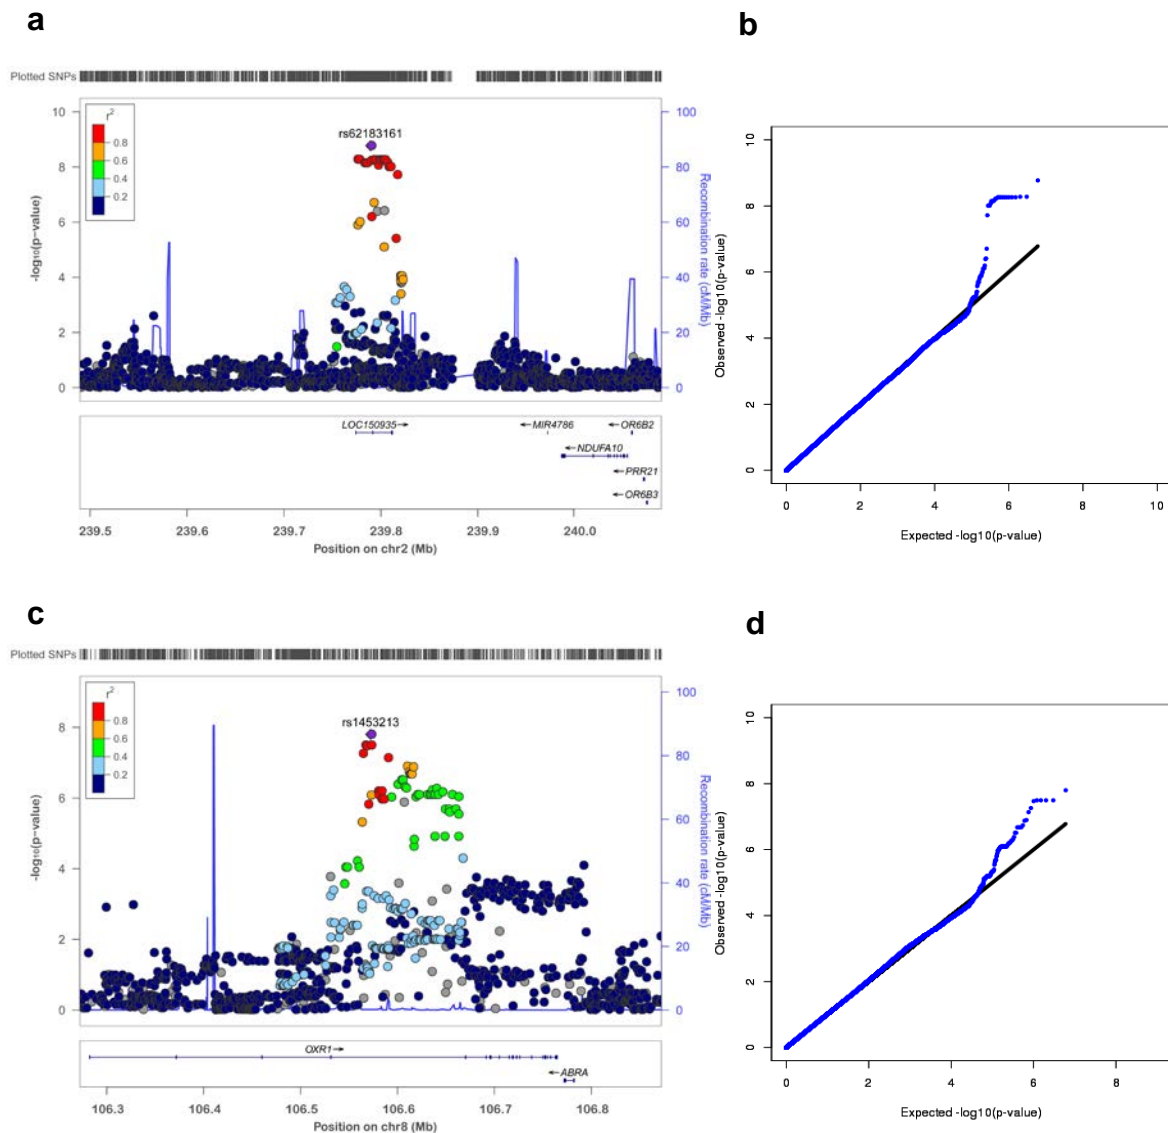

**Supplementary Fig. S4. Regional and Quantile-quantile (QQ) plots showing the associations between two top loci and taxa. a**, Regional plot of *LOC150935* associated with phylum Actinobacteria, the index SNP rs62183161 ( $P=1.68 \times 10^{-9}$ ) was showed in purple rhombus. **b**, QQ plot with observed  $-\log_{10}(p\text{ values})$  and the expected  $-\log_{10}(p\text{ values})$  for phylum Actinobacteria. The genomic inflation factor is 1.019 ( $\lambda=1.019$ ). **c**, Regional plot of *OXR1* associated with family Prevotellaceae, the index SNP rs1453123 ( $P= 1.58 \times 10^{-8}$ ) was showed in purple rhombus. **d**, QQ plot with observed  $-\log_{10}(p\text{ values})$  and the expected  $-\log_{10}(p\text{ values})$  for family Prevotellaceae. The genomic inflation factor is 1.018 ( $\lambda=1.018$ ).

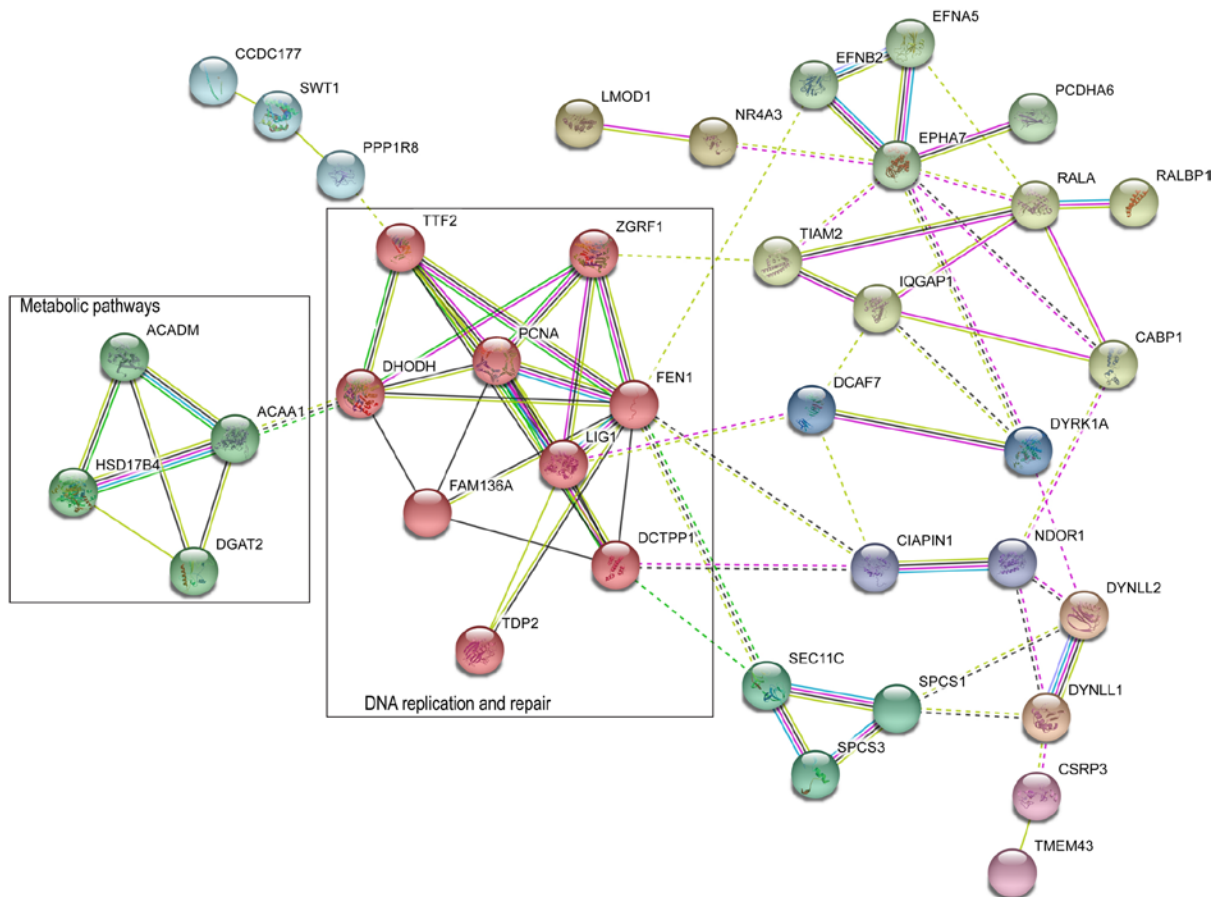

**Supplementary Fig. S5. Protein-protein interaction analyses.** The network contains 34 proteins and their 5 connected protein. Stronger associations are represented by thicker lines. Enrichment p-value=0.037. Two main pathways were marked with black rectangles, including metabolic pathways and DNA replication and repair pathways.

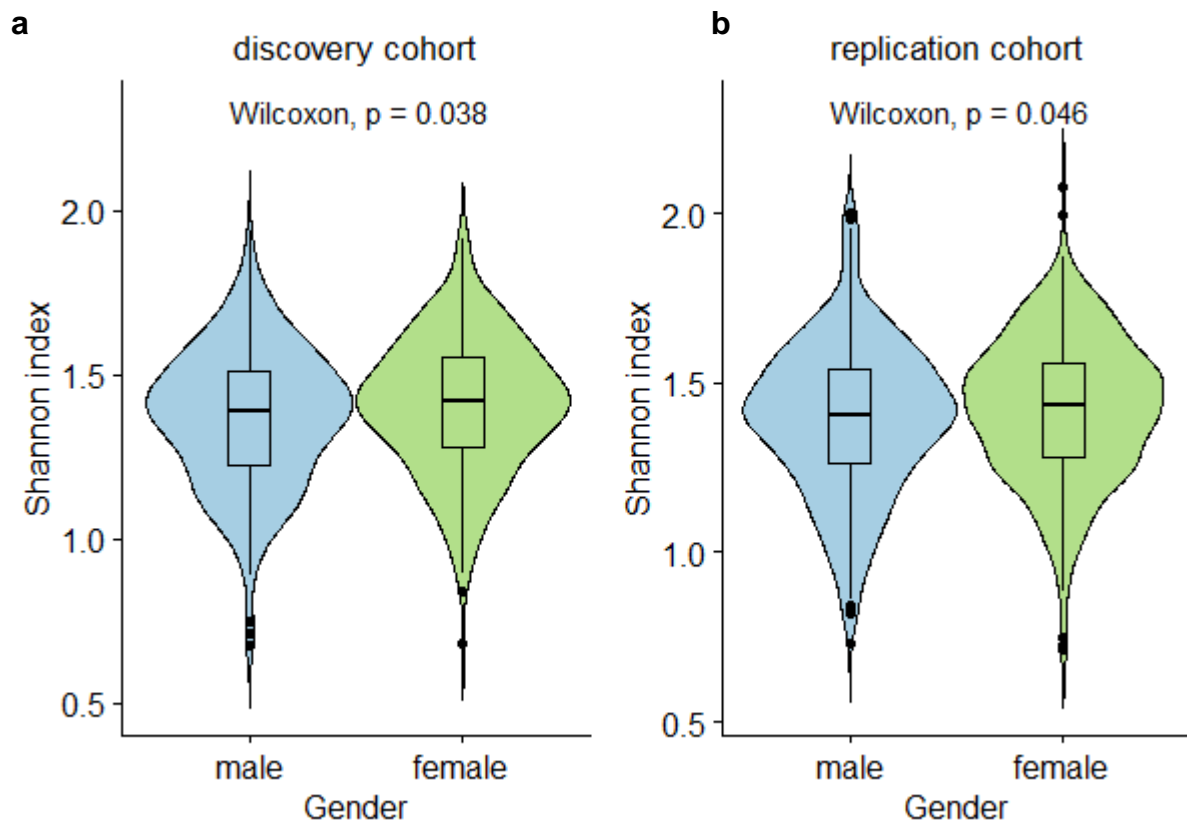

**Supplementary Fig. S6. Violin plots of sex differences on alpha diversity.** Alpha diversity was calculated for Shannon index based on genus-level relative abundance of taxa. Pairwise comparisons were performed using non-parametric test (Wilcoxon test). Both discovery (**a**) and replication (**b**) cohorts showed sex differences (Wilcoxon  $P=0.038$  and  $P=0.046$ , respectively).
